# Supplementary material for: Parental legacy, demography, and admixture influenced the evolution of the two subgenomes of the tetraploid Capsella bursa-pastoris (Brassicaceae)
Source: PubMed Central journal article supplement (PMC6395008; doi:10.1371/journal.pgen.1007949), 2019-02-15
Supplement: pgen.1007949.s002.pdf [file pgen.1007949.s002.pdf]

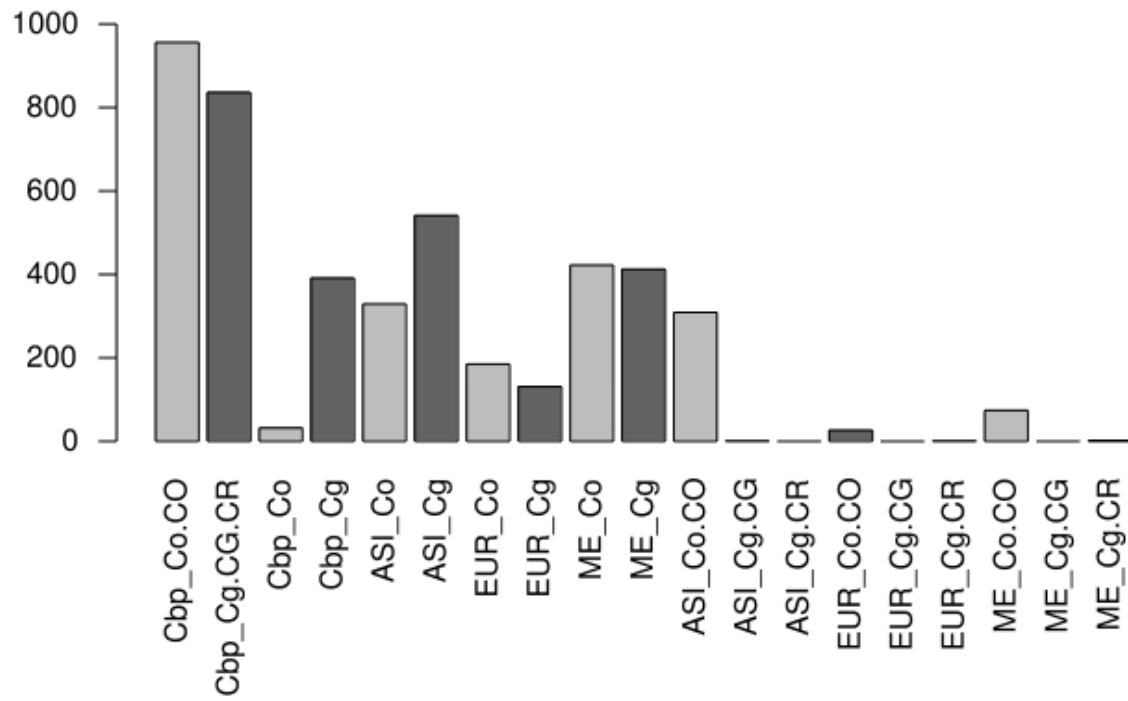

**S2 Figure. Frequency of monophyly of different groups.** ASI, EUR and ME are the three populations of *C. bursa-pastoris* (Cbp) with Co and Cg indicating two subgenomes. CO, CG, CR are short forms for *C. orientalis*, *C. grandiflora*, and *C. rubella* respectively.
