# Supplementary material for: Parental legacy, demography, and admixture influenced the evolution of the two subgenomes of the tetraploid Capsella bursa-pastoris (Brassicaceae)
Source: PubMed Central journal article supplement (PMC6395008; doi:10.1371/journal.pgen.1007949), 2019-02-15
Supplement: pgen.1007949.s008.pdf [file pgen.1007949.s008.pdf]

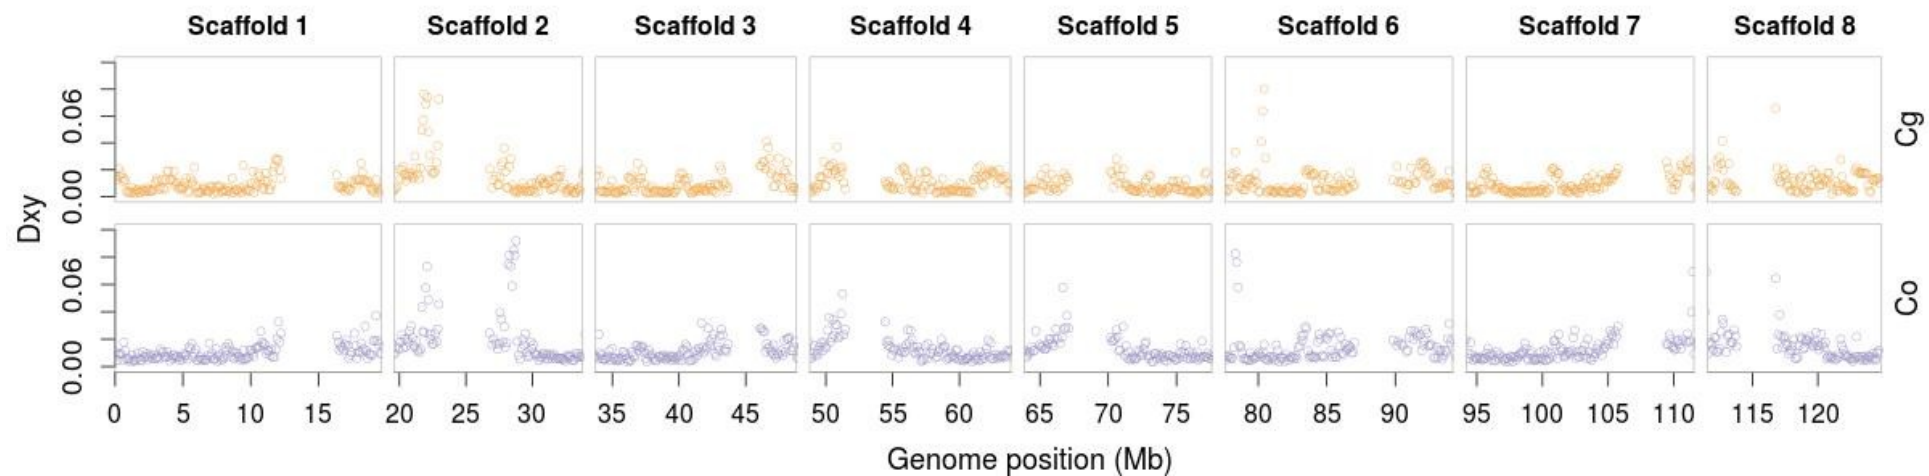

**S8 Figure. Genetic distance ( $D_{xy}$ ) between the data analyzed in this study and the assembly of *C. bursa-pastoris* by Kasianov et al. (2017). The corresponding subgenomes are marked with Cg and Co. Estimates were assessed for 100K windows on SNPs data and scaled to whole genome values.**
