# Supplementary material for: Parental legacy, demography, and admixture influenced the evolution of the two subgenomes of the tetraploid Capsella bursa-pastoris (Brassicaceae)
Source: PubMed Central journal article supplement (PMC6395008; doi:10.1371/journal.pgen.1007949), 2019-02-15
Supplement: pgen.1007949.s010.pdf [file pgen.1007949.s010.pdf]

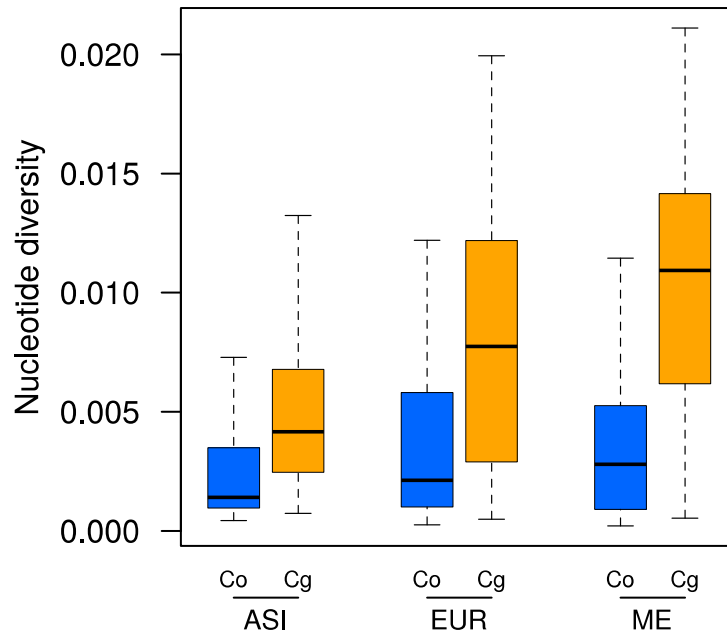

**S10 Figure. Variation in nucleotide diversity ( $\pi$ ) between subgenomes of *C. bursa-pastoris* in HomeoRoq phased data.** The distributions of  $\pi$  were estimated from 797,806 SNPs using 100 Kb sliding windows and scaled to whole genome scale. *Co* and *Cg* indicate *C. orientalis* and *C. grandiflora/rubella* descendant subgenomes, respectively. ASI, EUR, and ME correspond to Asian, European and Middle Eastern populations of *C. bursa-pastoris*, respectively.
