# Supplementary material for: Parental legacy, demography, and admixture influenced the evolution of the two subgenomes of the tetraploid Capsella bursa-pastoris (Brassicaceae)
Source: PubMed Central journal article supplement (PMC6395008; doi:10.1371/journal.pgen.1007949), 2019-02-15
Supplement: pgen.1007949.s013.pdf [file pgen.1007949.s013.pdf]

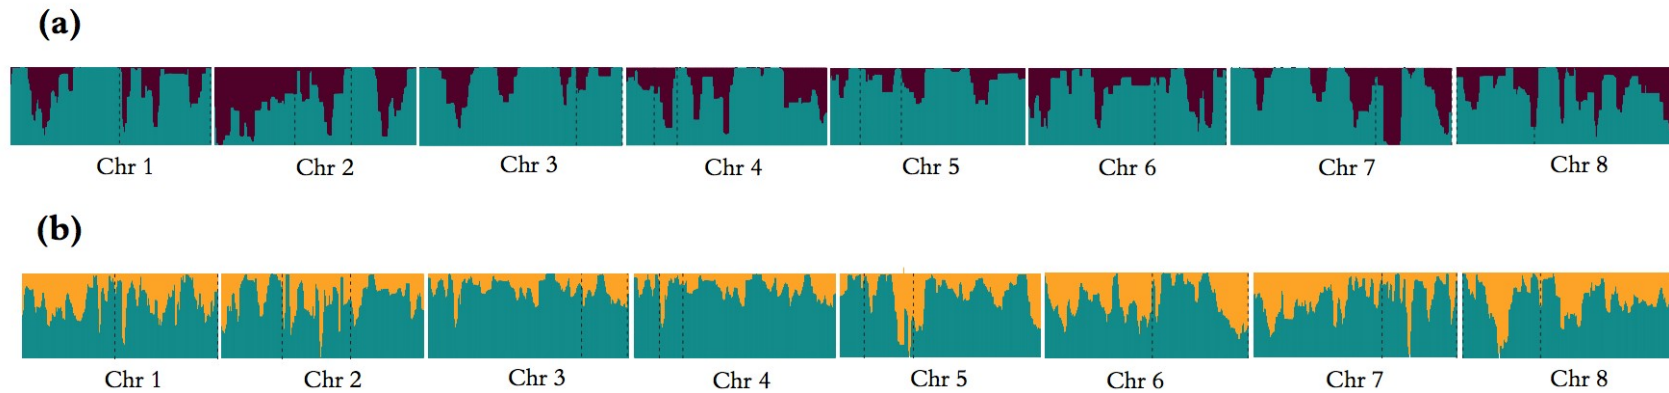

**S13 Figure. Bar plots of HAPMIX admixture probabilities for major scaffolds (chromosomes) of *C. bursa-pastoris*.** (a) Estimated admixture between *C. rubella* (dark red regions) and the European *Cbp<sub>Cg</sub>* subgenome, relative to the Middle Eastern *Cbp<sub>Cg</sub>* subgenome (green regions). Estimated admixture between (b) *C. orientalis* (orange regions) and the European *Cbp<sub>Co</sub>* subgenome, relative to the Middle Eastern *Cbp<sub>Co</sub>* subgenome (green regions). The limits of centromeric regions are indicated by vertical dashed lines.
