# Supplementary material for: Parental legacy, demography, and admixture influenced the evolution of the two subgenomes of the tetraploid Capsella bursa-pastoris (Brassicaceae)
Source: PubMed Central journal article supplement (PMC6395008; doi:10.1371/journal.pgen.1007949), 2019-02-15
Supplement: pgen.1007949.s014.pdf [file pgen.1007949.s014.pdf]

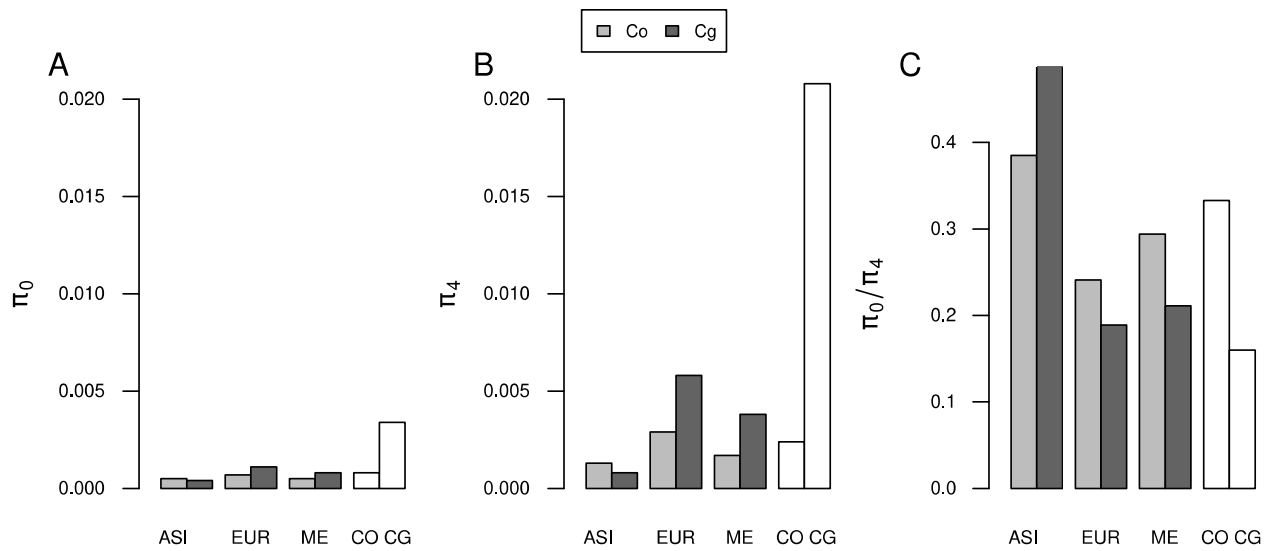

**S14 Figure. Nucleotide diversity ( $\pi$ ) in the coding part of the genome. A.** Nucleotide diversity in 0-fold ( $\pi_0$ ). **B.** Nucleotide diversity in 4-fold sites ( $\pi_4$ ). **C.** The ratio between  $\pi_0$  and  $\pi_4$ . ASI, EUR and ME are the three differentiated populations of *C. bursa-pastoris*. Co and Cg indicate corresponding subgenomes. CO and CG are short forms for *C. orientalis* and *C. grandiflora*, respectively.
