# Supplementary material for: Parental legacy, demography, and admixture influenced the evolution of the two subgenomes of the tetraploid Capsella bursa-pastoris (Brassicaceae)
Source: PubMed Central journal article supplement (PMC6395008; doi:10.1371/journal.pgen.1007949), 2019-02-15
Supplement: pgen.1007949.s024.pdf [file pgen.1007949.s024.pdf]

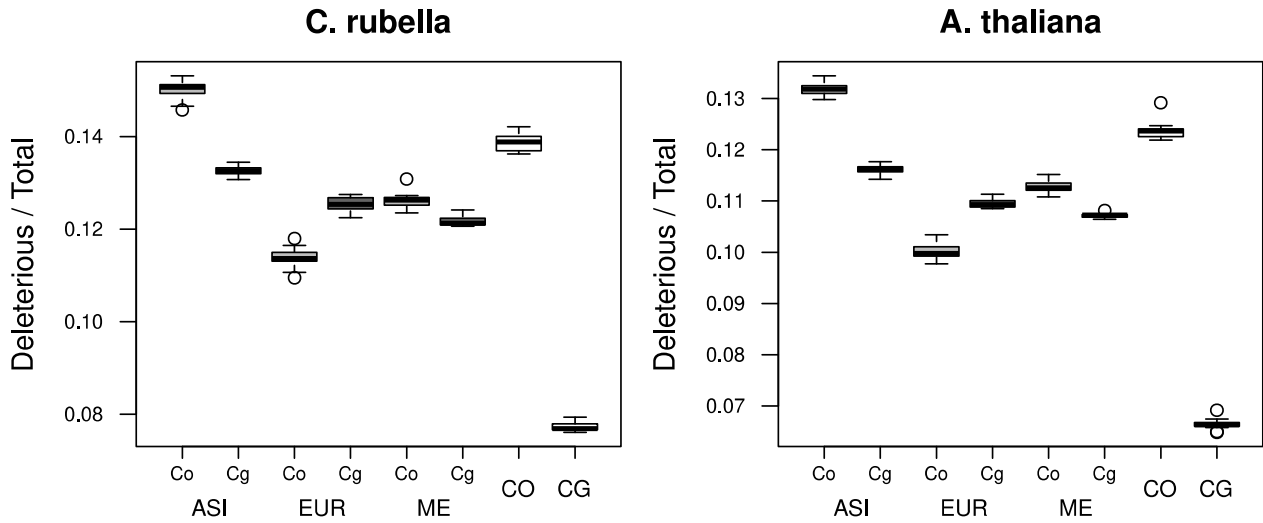

**S24 Figure. Genetic load in the subgenomes of *C. bursa-pastoris* and its parental species for species-specific mutations.** The proportion of deleterious nonsynonymous changes was estimated with SIFT4G on species-specific mutations that are unique alleles for *C. orientalis*, *C. grandiflora* and the two subgenomes of *C. bursa-pastoris*. The left plot shows the results obtained with *C. rubella* database, the right plot was obtained with *A. thaliana* database. Co and Cg are the two subgenomes of *C. bursa-pastoris*. ASI, EUR, ME, CO, CG indicate Asian, European and Middle Eastern populations of *C. bursa-pastoris*, and parental species *C. orientalis* and *C. grandiflora*, respectively.
