# Supplementary material for: Parental legacy, demography, and admixture influenced the evolution of the two subgenomes of the tetraploid Capsella bursa-pastoris (Brassicaceae)
Source: PubMed Central journal article supplement (PMC6395008; doi:10.1371/journal.pgen.1007949), 2019-02-15
Supplement: pgen.1007949.s025.pdf [file pgen.1007949.s025.pdf]

**S1 Table.** Sequencing and phasing information.

| Accession  | Total number of reads | Number of mapped reads | Number of mapped paired reads (both in pair) | Mean coverage | SNPs    | Heterozygots SNPs | Missing | Phased Heterozygots | SNPs after phasing | Genotypes in whole genome alignment | Genotypes in whole-genome after phasing |
|------------|-----------------------|------------------------|----------------------------------------------|---------------|---------|-------------------|---------|---------------------|--------------------|-------------------------------------|-----------------------------------------|
| 12.4       | 49464054              | 45557201               | 44499507                                     | 36            | 6121356 | 2905233           | 940549  | 2346266             | 4999676            | 98257035                            | 72118966                                |
| 13.16      | 52845124              | 47568226               | 46301587                                     | 38            | 6138305 | 2921106           | 923600  | 2298020             | 4887614            | 99216717                            | 72118966                                |
| 16.9       | 57887747              | 53690444               | 52518383                                     | 43            | 6150065 | 2910658           | 911840  | 2351345             | 5029618            | 99471512                            | 72224559                                |
| 1939-12-28 | 53902068              | 47795879               | 46463357                                     | 38            | 6080116 | 2908808           | 981789  | 2330121             | 4917715            | 97117816                            | 72224559                                |
| 5.16       | 53139204              | 46608524               | 45147337                                     | 37            | 5959594 | 2839505           | 1102311 | 2308444             | 4887015            | 95675598                            | 72349318                                |
| 70.5       | 55124805              | 49200993               | 47855451                                     | 39            | 5890303 | 2811262           | 1171602 | 2287111             | 4833694            | 95214208                            | 72349318                                |
| AL87       | 59970536              | 53452762               | 51908654                                     | 39            | 4993017 | 2252446           | 2068888 | 1847100             | 4127492            | 82421369                            | 71516706                                |
| BEL5       | 80937786              | 71299545               | 69198355                                     | 52            | 5555348 | 2690358           | 1506557 | 1958817             | 4099234            | 91392255                            | 71516706                                |
| DL174      | 76005581              | 58828043               | 55756083                                     | 43            | 4874837 | 2218696           | 2187068 | 1838528             | 4065553            | 79779739                            | 70582485                                |
| FR50       | 70612809              | 58168853               | 56174727                                     | 43            | 5043544 | 2253542           | 2018361 | 1844371             | 4157102            | 83989319                            | 70582485                                |
| GY37       | 79610942              | 70780094               | 68897241                                     | 52            | 4973428 | 2254374           | 2088477 | 1844561             | 4098621            | 82173857                            | 70058290                                |
| HJC419     | 80712836              | 66977963               | 64417680                                     | 49            | 5525451 | 2574615           | 1536454 | 2058837             | 4462904            | 90246365                            | 70058290                                |
| HRB132     | 75789495              | 60995844               | 58043985                                     | 45            | 5886199 | 2776379           | 1175706 | 2217299             | 4744199            | 95248326                            | 60514775                                |
| HY85       | 67500437              | 53986788               | 51381588                                     | 40            | 5692278 | 2691156           | 1369627 | 2200661             | 4694684            | 92006976                            | 60514775                                |
| IRRU2      | 76929364              | 69564152               | 67907823                                     | 51            | 5425246 | 2472742           | 1636659 | 1991234             | 4405418            | 89432280                            | 66881028                                |
| JO56       | 79470603              | 67046138               | 64397023                                     | 49            | 5653123 | 2649382           | 1408782 | 2159880             | 4651624            | 91957943                            | 66881028                                |
| JZH152     | 80652085              | 67163379               | 64593245                                     | 49            | 5475564 | 2540707           | 1586341 | 2049915             | 4451070            | 89469067                            | 59430965                                |
| KMB206     | 78975546              | 66355143               | 63957155                                     | 49            | 4970075 | 2253892           | 2091830 | 1848536             | 4107289            | 82138896                            | 59430965                                |
| NJ219      | 67776611              | 57774620               | 55881123                                     | 42            | 4740856 | 2144863           | 2321049 | 1761379             | 3919129            | 78693540                            | 61564298                                |
| PL         | 78544520              | 70779212               | 69236572                                     | 78            | 6178036 | 2997065           | 883869  | 2296097             | 4812102            | 98704361                            | 61564298                                |
| RK32       | 58340940              | 52216435               | 50786351                                     | 41            | 6069313 | 2886144           | 992592  | 2334764             | 4955856            | 97453700                            | 61088073                                |
| SE14       | 78611608              | 67949620               | 66051904                                     | 75            | 6308942 | 3038188           | 752963  | 2343422             | 4943223            | 102149081                           | 61088073                                |
| SE33       | 78120829              | 68824457               | 66784671                                     | 51            | 5441078 | 2494867           | 1620827 | 2003876             | 4403731            | 89860912                            | 66844290                                |
| STA4       | 76063405              | 64087118               | 61595543                                     | 47            | 5167167 | 2357164           | 1894738 | 1916937             | 4237381            | 84991358                            | 66844290                                |
| STJ2       | 77687488              | 67938722               | 65955342                                     | 50            | 5364007 | 2442565           | 1697898 | 1980790             | 4389954            | 89317913                            | 70058648                                |
| TBS195     | 75620897              | 65288373               | 63326796                                     | 48            | 4981222 | 2260746           | 2080683 | 1857707             | 4127273            | 82446889                            | 70058648                                |
| TR73       | 77624846              | 64179290               | 61503301                                     | 47            | 5073550 | 2309054           | 1988355 | 1898751             | 4207231            | 83635729                            | 68214092                                |
| TY118      | 68816910              | 53791171               | 50983722                                     | 39            | 5072029 | 2336960           | 1989876 | 1940936             | 4239747            | 82747183                            | 68214092                                |
| VLA3       | 77085815              | 65409644               | 63156669                                     | 48            | 5117585 | 2306564           | 1944320 | 1876328             | 4197115            | 85220147                            | 65805269                                |
| WAC5       | 74611864              | 62596618               | 59962710                                     | 46            | 5786987 | 2717785           | 1274918 | 2195675             | 4728586            | 94034921                            | 65805269                                |
| XN444      | 76675754              | 63395249               | 60792822                                     | 46            | 5140099 | 2356177           | 1921806 | 1937268             | 4254116            | 84443325                            | 67866392                                |
