# Supplementary material for: Parental legacy, demography, and admixture influenced the evolution of the two subgenomes of the tetraploid Capsella bursa-pastoris (Brassicaceae)
Source: PubMed Central journal article supplement (PMC6395008; doi:10.1371/journal.pgen.1007949), 2019-02-15
Supplement: pgen.1007949.s026.pdf [file pgen.1007949.s026.pdf]

**S2 Table.** Nucleotide diversity  $\pi$  and absolute divergence  $D_{xy}$  between different subgenomes of *C. bursa-pastoris* populations and its parental species.

| Species    |        | <i>C. b-p.</i> |        |        | CO     | Species    |        | <i>C. b-p.</i> |        |        | CG     |
|------------|--------|----------------|--------|--------|--------|------------|--------|----------------|--------|--------|--------|
|            |        | ASI_Co         | EUR_Co | ME_Co  |        |            |        | ASI_Cg         | EUR_Cg | ME_Cg  |        |
| <i>Cbp</i> | ASI_Co | 0.0030         |        |        |        | <i>Cbp</i> | ASI_Cg | 0.0017         |        |        |        |
|            | EUR_Co | 0.0083         | 0.0046 |        |        |            | EUR_Cg | 0.0072         | 0.0051 |        |        |
|            | ME_Co  | 0.0076         | 0.0072 | 0.0032 |        |            | ME_Cg  | 0.0064         | 0.0073 | 0.0034 |        |
| CO         |        | 0.0071         | 0.0097 | 0.0089 | 0.0020 | CG         |        | 0.0213         | 0.0203 | 0.0209 | 0.0174 |

The diagonal values (in gray) correspond to  $\pi$  of the corresponding subgenome within each population/species. The below diagonal values represent  $D_{xy}$  values. ASI, EUR and ME are the three differentiated populations of *C. bursa-pastoris* (*Cbp*) with Co and Cg indicating corresponding subgenomes. CO and CG are short forms for *C. orientalis* and *C. grandiflora*, respectively.
