# Supplementary material for: Parental legacy, demography, and admixture influenced the evolution of the two subgenomes of the tetraploid Capsella bursa-pastoris (Brassicaceae)
Source: PubMed Central journal article supplement (PMC6395008; doi:10.1371/journal.pgen.1007949), 2019-02-15
Supplement: pgen.1007949.s028.pdf [file pgen.1007949.s028.pdf]

**S4 Table.** Multiple comparisons for the generalized linear model of the topology weighting of the *Cbp<sub>Cg</sub>* subgenome of *C. bursa-pastoris* and *C. rubella*.

| <b>Comparison</b> | <b>Estimate</b> | <b>Std. Error</b> | <b>z value</b> | <b>p-value</b> |
|-------------------|-----------------|-------------------|----------------|----------------|
| ASI_CR - species  | -3.711          | 0.022             | -166.33        | 0.0000         |
| ASI_CR - EUR_CR   | -1.425          | 0.016             | -90.97         | 0.0000         |
| ASI_CR - ME_CR    | -0.797          | 0.016             | -50.48         | 0.0000         |
| EUR_CR - species  | -2.286          | 0.021             | -107.07        | 0.0000         |
| EUR_CR - ME_CR    | 0.628           | 0.014             | 43.65          | 0.0000         |
| ME_CR - species   | -2.914          | 0.021             | -135.94        | 0.0000         |

With the binomial family, the null deviance was 274261 on 198584 degrees of freedom, and residual deviance of 225829 on 198580 degrees of freedom.
