# Supplementary material for: Parental legacy, demography, and admixture influenced the evolution of the two subgenomes of the tetraploid Capsella bursa-pastoris (Brassicaceae)
Source: PubMed Central journal article supplement (PMC6395008; doi:10.1371/journal.pgen.1007949), 2019-02-15
Supplement: pgen.1007949.s029.pdf [file pgen.1007949.s029.pdf]

**S5 Table.** Multiple comparisons for the generalized linear model of the topology weighting of the *Cbp<sub>Cg</sub>* subgenome and *C. grandiflora*.

| <b>Comparison</b> | <b>Estimate</b> | <b>Std. Error</b> | <b>z value</b> | <b>p-value</b> |
|-------------------|-----------------|-------------------|----------------|----------------|
| ASI_CG - species  | -3.783          | 0.028             | -133.48        | 0.0000         |
| ASI_CG - EUR_CG   | -0.881          | 0.015             | -60.55         | 0.0000         |
| ASI_CG - ME_CG    | -0.402          | 0.014             | -27.77         | 0.0000         |
| EUR_CG - species  | -2.902          | 0.028             | -102.68        | 0.0000         |
| EUR_CG - ME_CG    | 0.480           | 0.014             | 33.50          | 0.0000         |
| ME_CG - species   | -3.381          | 0.028             | -119.83        | 0.0000         |

With the binomial family, the null deviance was 262921 on 198584 degrees of freedom, and residual deviance of 219219 on 198580 degrees of freedom.
