# Supplementary material for: Parental legacy, demography, and admixture influenced the evolution of the two subgenomes of the tetraploid Capsella bursa-pastoris (Brassicaceae)
Source: PubMed Central journal article supplement (PMC6395008; doi:10.1371/journal.pgen.1007949), 2019-02-15
Supplement: pgen.1007949.s031.pdf [file pgen.1007949.s031.pdf]

**S7 Table.** Results of the ABBA-BABA tests assessing the admixture between *C. bursa-pastoris* and *C. orientalis*, *C. rubella* for the complete phased data.

| <b>P1</b> | <b>P2</b> | <b>P3</b> | <b>D</b> | <b>D error</b> | <b>Z-score</b> | <b>P-value</b> | <b>f</b> | <b>f error</b> |
|-----------|-----------|-----------|----------|----------------|----------------|----------------|----------|----------------|
| EUR       | ASI       | CO        | 0.47     | 0.05           | 8.68           | <0.0001        | 19.0%    | 2.5%           |
| ME        | ASI       | CO        | 0.38     | 0.06           | 5.91           | <0.0001        | 13.8%    | 2.6%           |
| ME        | EUR       | CO        | -0.21    | 0.06           | -3.57          | 0.0004         | -6.4%    | 2.0%           |
| EUR       | ASI       | CR        | -0.73    | 0.03           | -26.40         | <0.0001        | -16.1%   | 2.1%           |
| ME        | ASI       | CR        | -0.60    | 0.04           | -14.14         | <0.0001        | -8.3%    | 1.5%           |
| ME        | EUR       | CR        | 0.31     | 0.07           | 4.30           | <0.0001        | 6.8%     | 1.6%           |

P1, P2, and P3 refer to the three populations used in the ABBA-BABA tests. A significantly positive *D* indicates admixture between *P2* and *P3*. *f* provides an estimate of the fraction of admixture. *Z*-score and *P*-value were estimated with the block jack-knife method. The error term corresponds to a standard error. ASI, EUR and ME are the three populations of *C. bursa-pastoris*. CO and CR stand for *C. orientalis* and *C. rubella*, respectively. The complete dataset (i.e. data without any missing point) comprised 1,427,289 sites.
