# Supplementary material for: Parental legacy, demography, and admixture influenced the evolution of the two subgenomes of the tetraploid Capsella bursa-pastoris (Brassicaceae)
Source: PubMed Central journal article supplement (PMC6395008; doi:10.1371/journal.pgen.1007949), 2019-02-15
Supplement: pgen.1007949.s032.pdf [file pgen.1007949.s032.pdf]

**S8 Table.** Summary of the probabilities and proportions of admixture from HAPMIX analyses of each of the *C. bursa-pastoris* subgenomes.

| Focal Population                  | Diploid Reference Population | Alt. Reference Population | Mean Genome-wide Admixture Probability | Mean Introg. Probability   > .5 | Mean Introg. Probability   < .5 | Proportion of Admixture Genome-wide | n     | n ( Admixed Sites) |
|-----------------------------------|------------------------------|---------------------------|----------------------------------------|---------------------------------|---------------------------------|-------------------------------------|-------|--------------------|
| <i>Cbp<sub>Cg</sub></i> subgenome |                              |                           |                                        |                                 |                                 |                                     |       |                    |
| EUR_Cg                            | CR                           | ASI_Cg                    | 0.242                                  | 0.682                           | 0.144                           | 0.182                               | 8798  | 1597               |
| EUR_Cg                            | CG                           | ASI_Cg                    | 0.115                                  | 0.650                           | 0.075                           | 0.069                               | 19122 | 1327               |
| ME_Cg                             | CR                           | ASI_Cg                    | 0.128                                  | 0.668                           | 0.060                           | 0.111                               | 6776  | 754                |
| ME_Cg                             | CG                           | ASI_Cg                    | 0.084                                  | 0.684                           | 0.043                           | 0.063                               | 14422 | 910                |
| ASI_Cg                            | CR                           | EUR_Cg                    | 0.022                                  | 0.822                           | 0.005                           | 0.020                               | 52959 | 1075               |
| ASI_Cg                            | CG                           | EUR_Cg                    | 0.003                                  | 0.809                           | 0.001                           | 0.002                               | 76408 | 186                |
| <i>Cbp<sub>Co</sub></i> subgenome |                              |                           |                                        |                                 |                                 |                                     |       |                    |
| EUR_Co                            | CR                           | ASI_Co                    | 0.013                                  | 0.000                           | 0.013                           | 0.000                               | 11441 | 0                  |
| EUR_Co                            | CO                           | ASI_Co                    | 0.456                                  | 0.635                           | 0.326                           | 0.421                               | 76758 | 32310              |
| EUR_Co                            | CO                           | ME_Co                     | 0.288                                  | 0.612                           | 0.234                           | 0.144                               | 50472 | 7252               |
| ME_Co                             | CR                           | ASI_Co                    | 0.006                                  | 0.000                           | 0.006                           | 0.000                               | 9656  | 0                  |
| ME_Co                             | CO                           | ASI_Co                    | 0.214                                  | 0.786                           | 0.113                           | 0.188                               | 14903 | 2803               |
| ME_Co                             | CO                           | EUR_Co                    | 0.189                                  | 0.652                           | 0.148                           | 0.082                               | 68516 | 5628               |
| ASI_Co                            | CR                           | EUR_Co                    | 0.004                                  | 0.000                           | 0.004                           | 0.000                               | 17560 | 0                  |
| ASI_Co                            | CO                           | EUR_Co                    | 0.442                                  | 0.766                           | 0.245                           | 0.379                               | 88001 | 33330              |
| ASI_Co                            | CO                           | ME_Co                     | 0.289                                  | 0.707                           | 0.216                           | 0.148                               | 44730 | 6638               |

For each analysis, the reported probabilities and proportion of admixture refers to admixture between the diploid reference population and the focal population. Estimates exclude sites that fall within centromeric regions.
