# Supplementary material for: Parental legacy, demography, and admixture influenced the evolution of the two subgenomes of the tetraploid Capsella bursa-pastoris (Brassicaceae)
Source: PubMed Central journal article supplement (PMC6395008; doi:10.1371/journal.pgen.1007949), 2019-02-15
Supplement: pgen.1007949.s033.pdf [file pgen.1007949.s033.pdf]

**S9 Table.** Multiple comparisons for the generalized linear model on the genetic load estimated with the *C. rubella* SIFT4G database.

| <b>Comparison</b> | <b>Estimate</b> | <b>Std. Error</b> | <b>z value</b> | <b>p-value</b> |
|-------------------|-----------------|-------------------|----------------|----------------|
| ASI_Co - ASI_Cg   | 0.2243          | 0.0190            | 11.82          | 0.0000         |
| EUR_Co - EUR_Cg   | 0.0995          | 0.0174            | 5.72           | 0.0000         |
| ME_Co - ME_Cg     | 0.1997          | 0.0232            | 8.61           | 0.0000         |
| CO - CG           | 0.8747          | 0.0147            | 59.44          | 0.0000         |
| CG - ASI_Cg       | -0.7008         | 0.0134            | -52.43         | 0.0000         |
| EUR_Cg - CG       | 0.4557          | 0.0135            | 33.73          | 0.0000         |
| ME_Cg - CG        | 0.5337          | 0.0163            | 32.83          | 0.0000         |
| CO - ASI_Co       | -0.0504         | 0.0199            | -2.52          | 0.1317         |
| EUR_Co - CO       | -0.3195         | 0.0184            | -17.40         | 0.0000         |
| ME_Co - CO        | -0.1412         | 0.0222            | -6.38          | 0.0000         |
| EUR_Cg - ASI_Cg   | -0.2451         | 0.0149            | -16.42         | 0.0000         |
| ME_Cg - ASI_Cg    | -0.1670         | 0.0175            | -9.57          | 0.0000         |
| ME_Cg - EUR_Cg    | 0.0781          | 0.0176            | 4.44           | 0.0002         |
| EUR_Co - ASI_Co   | -0.3699         | 0.0210            | -17.62         | 0.0000         |
| ME_Co - ASI_Co    | -0.1916         | 0.0244            | -7.86          | 0.0000         |
| ME_Co - EUR_Co    | 0.1783          | 0.0231            | 7.72           | 0.0000         |

Dispersion parameter for the quasibinomial family was 7.88, with null deviance of 48724 on 84 degrees of freedom, and residual deviance of 612 on 77 degrees of freedom.
