# Supplementary material for: Parental legacy, demography, and admixture influenced the evolution of the two subgenomes of the tetraploid Capsella bursa-pastoris (Brassicaceae)
Source: PubMed Central journal article supplement (PMC6395008; doi:10.1371/journal.pgen.1007949), 2019-02-15
Supplement: pgen.1007949.s034.pdf [file pgen.1007949.s034.pdf]

**S10 Table.** Multiple comparisons for the generalized linear model on the genetic load estimated with the *A. thaliana* SIFT4G database.

| <b>Comparison</b> | <b>Estimate</b> | <b>Std. Error</b> | <b>z value</b> | <b>p-value</b> |
|-------------------|-----------------|-------------------|----------------|----------------|
| ASI_Co - ASI_Cg   | 0.1446          | 0.0066            | 22.00          | 0.0000         |
| EUR_Co - EUR_Cg   | -0.1000         | 0.0061            | -16.51         | 0.0000         |
| ME_Co - ME_Cg     | 0.0576          | 0.0079            | 7.31           | 0.0000         |
| CO - CG           | 0.6857          | 0.0057            | 119.40         | 0.0000         |
| CG - ASI_Cg       | -0.6140         | 0.0046            | -132.33        | 0.0000         |
| EUR_Cg - CG       | 0.5485          | 0.0048            | 114.21         | 0.0000         |
| ME_Cg - CG        | 0.5236          | 0.0058            | 91.02          | 0.0000         |
| CO - ASI_Co       | -0.0730         | 0.0074            | -9.87          | 0.0000         |
| EUR_Co - CO       | -0.2372         | 0.0068            | -34.74         | 0.0000         |
| ME_Co - CO        | -0.1045         | 0.0079            | -13.26         | 0.0000         |
| EUR_Cg - ASI_Cg   | -0.0655         | 0.0054            | -12.04         | 0.0000         |
| ME_Cg - ASI_Cg    | -0.0905         | 0.0063            | -14.36         | 0.0000         |
| ME_Cg - EUR_Cg    | -0.0249         | 0.0064            | -3.88          | 0.0016         |
| EUR_Co - ASI_Co   | -0.3102         | 0.0071            | -43.75         | 0.0000         |
| ME_Co - ASI_Co    | -0.1775         | 0.0081            | -21.89         | 0.0000         |
| ME_Co - EUR_Co    | 0.1328          | 0.0076            | 17.48          | 0.0000         |

Dispersion parameter for the quasibinomial family was 0.81, with null deviance of 29943 on 85 degrees of freedom, and residual deviance of 62 on 77 degrees of freedom.
