# Supplementary material for: Parental legacy, demography, and admixture influenced the evolution of the two subgenomes of the tetraploid Capsella bursa-pastoris (Brassicaceae)
Source: PubMed Central journal article supplement (PMC6395008; doi:10.1371/journal.pgen.1007949), 2019-02-15
Supplement: pgen.1007949.s035.pdf [file pgen.1007949.s035.pdf]

**S11 Table.** Multiple comparisons for the generalized linear model testing for the expression difference between populations.

| <b>Comparison</b> | <b>Estimate</b> | <b>Std. Error</b> | <b>z value</b> | <b>p-value</b> |
|-------------------|-----------------|-------------------|----------------|----------------|
| ASI – EUR         | 0.0197          | 0.0020            | 9.92           | 0.0000         |
| ASI – ME          | 0.0229          | 0.0025            | 9.02           | 0.0000         |
| EUR – ME          | 0.0032          | 0.0026            | 1.25           | 0.0100         |

Dispersion parameter for the quasibinomial family was 0.069, with null deviance of 25444 on 344116 degrees of freedom, and residual deviance of 25435 on 344114 degrees of freedom.
