# Supplementary material for: Parental legacy, demography, and admixture influenced the evolution of the two subgenomes of the tetraploid Capsella bursa-pastoris (Brassicaceae)
Source: PubMed Central journal article supplement (PMC6395008; doi:10.1371/journal.pgen.1007949), 2019-02-15
Supplement: pgen.1007949.s036.pdf [file pgen.1007949.s036.pdf]

**S12 Table.** Alternative combinations used in the ABBA-BABA tests.

| <b>P<sub>1</sub></b> | <b>P<sub>2</sub></b> | <b>P<sub>3</sub></b> | <b><i>D</i>±error</b> | <b>Z-score</b> | <b><i>P</i>-value</b> | <b><i>f</i>±error (%)</b> |
|----------------------|----------------------|----------------------|-----------------------|----------------|-----------------------|---------------------------|
| EUR_Cg               | ASI_Cg               | CO                   | 0.20±0.02             | 9.94           | <0.0001               | 2.2±0.3                   |
| ME_Cg                | ASI_Cg               | CO                   | 0.20±0.02             | 8.07           | <0.0001               | 1.8±0.3                   |
| EUR_Cg               | ME_Cg                | CO                   | 0.04±0.01             | 4.40           | <0.0001               | 0.4±0.1                   |
| ASI_Co               | EUR_Co               | CG                   | 0.02±0.01             | 1.27           | 0.2042                | 0.4±0.3                   |
| ME_Co                | ASI_Co               | CG                   | 0.02±0.01             | 1.40           | 0.1619                | 0.4±0.3                   |
| ME_Co                | EUR_Co               | CG                   | 0.04±0.01             | 3.71           | <0.0002               | 0.8±0.2                   |
| ASI_Co               | EUR_Co               | CR                   | 0.06±0.02             | 3.57           | <0.0004               | 0.8±0.2                   |
| ASI_Co               | ME_Co                | CR                   | 0.00±0.02             | 0.28           | 0.7817                | 0.1±0.2                   |
| ME_Co                | EUR_Co               | CR                   | 0.06±0.01             | 4.8            | <0.0001               | 0.7±0.2                   |
| CR                   | CG                   | CO                   | 0.21±0.01             | 33.64          | <0.0001               | 3.1±0.1                   |

P<sub>1</sub>, P<sub>2</sub>, and P<sub>3</sub> refer to the three populations used in the ABBA-BABA tests. A significantly positive *D* indicates admixture between P<sub>2</sub> and P<sub>3</sub>. *f* provides an estimate of the fraction of admixture. Z-score and *P*-value were estimated with the block jack-knife method. The error term corresponds to a standard error. ASI, EUR and ME are the three populations of *C. bursa-pastoris* with \_Co and \_Cg indicating different subgenomes. CO, CG, and CR are short forms for *C. orientalis*, *C. grandiflora*, *C. rubella*, respectively.
