# Supplementary material for: Parental legacy, demography, and admixture influenced the evolution of the two subgenomes of the tetraploid Capsella bursa-pastoris (Brassicaceae)
Source: PLOS journal article supplement (doi:10.1371/journal.pgen.1007949), 2019-02-15
Supplement: S4 (10.1371/journal.pgen.1007949.s004) [file journal.pgen.1007949.s004]

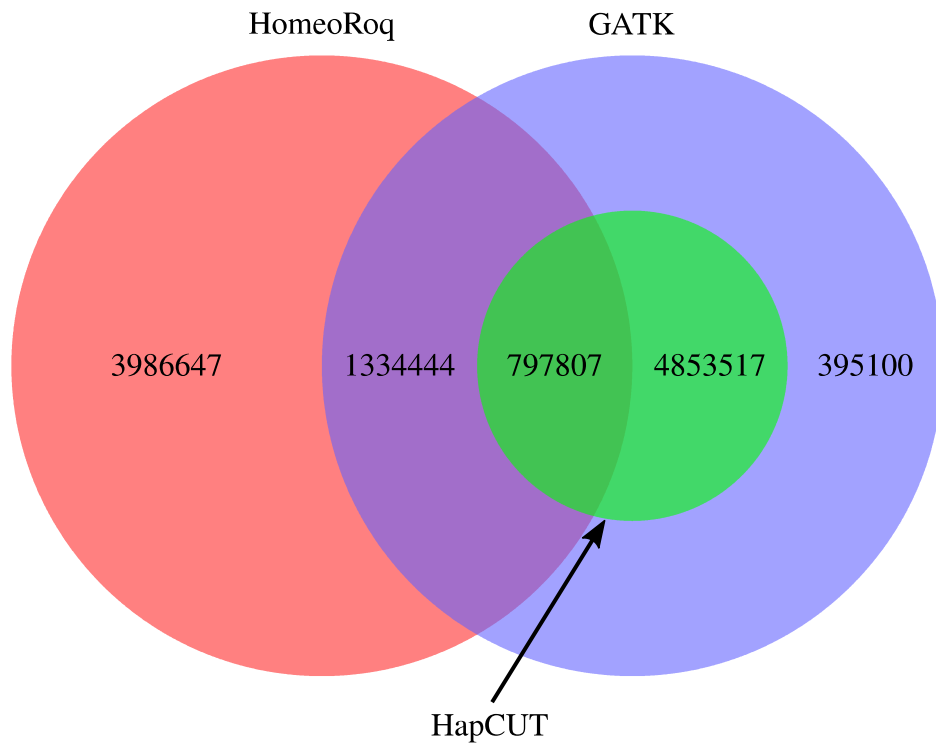

**S4 Figure. Overlap in SNPs called with GATK, HomeoRoq, and HapCUT phasing.** GATK SNPs include all high-quality unphased SNPs. HapCUT SNPs include all successfully phased GATK SNPs. Overlap with HomeoRoq was possible to access only for positions that were aligned between the *C. rubella* reference and the *C. bursa-pastoris* assembly.
