# Supplementary material for: Parental legacy, demography, and admixture influenced the evolution of the two subgenomes of the tetraploid Capsella bursa-pastoris (Brassicaceae)
Source: PLOS journal article supplement (doi:10.1371/journal.pgen.1007949), 2019-02-15
Supplement: S12 (10.1371/journal.pgen.1007949.s012) [file journal.pgen.1007949.s012]

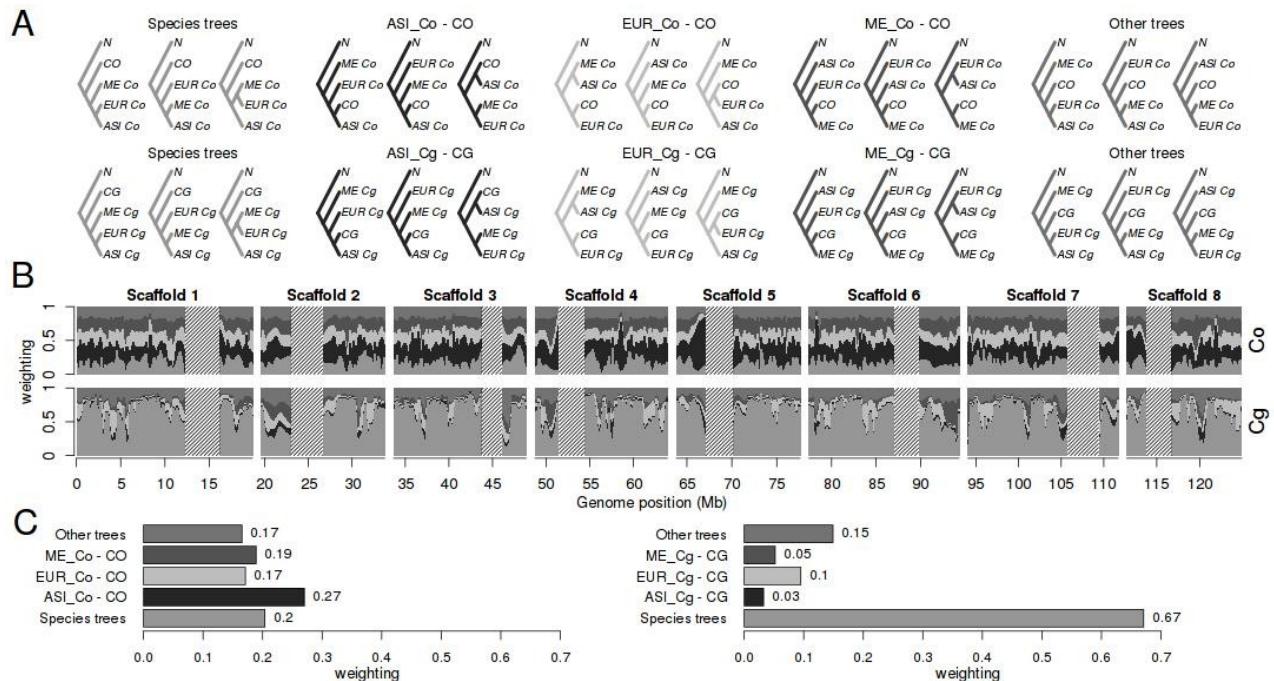

**S12 Figure. Topology weighting of the three populations of *C. bursa-pastoris*, *C. orientalis*, and *C. grandiflora*.** **A.** Fifteen possible rooted topologies for the three groups of *C. bursa-pastoris* in one subgenome and corresponding parental species. The topologies are grouped into five main groups. Co and Cg indicate the two subgenomes. ASI, EUR ME, CO, CG, N indicate Asian, European and Middle Eastern populations of *C.bursa-pastoris*, *C. orientalis*, *C. grandiflora*, and *N. paniculata*, respectively. **B.** Topology weightings for 100 SNP windows plotted along 8 main scaffolds with loess smoothing (span = 1Mb). The tentative centromeric regions are shaded. **C.** Average weighting for the five main topology groups.
